# Supplementary material
Source: PubMed Central journal article supplement (PMC5757376)
Supplement: NIHMS930275-supplement-Suppl.pdf [file NIHMS930275-supplement-Suppl.pdf]

## Supplementary Online Content

Mittendorf EA, Vila J, Tucker SL, et al. The Neo-Bioscore Update for Staging Breast Cancer Treated With Neoadjuvant Chemotherapy: Incorporation of Prognostic Biologic Factors Into Staging After Treatment. *JAMA Oncol*.

Published online March 17, 2016. doi:10.1001/jamaoncol.2015.6478.

**eTable 1.** Clinicopathologic factors and treatment regimens

**eFigure 1.** Disease-specific survival by CPS+EG stage using a cutoff of 10% to define ER positivity

**eFigure 2.** CPS+EG score DSS by HER2 status

This supplementary material has been provided by the authors to give readers additional information about their work.

eTable 1. Clinicopathologic factors and treatment regimens

| Variable                         | No. of Patients (%) |
|----------------------------------|---------------------|
| <i>Age at diagnosis, year</i>    |                     |
| Mean                             | 50                  |
| Median (range)                   | 50 (21-87)          |
| <i>Clinical tumor size, cm</i>   |                     |
| Median                           | 4                   |
| Range                            | 0-20                |
| <i>Clinical T stage</i>          |                     |
| T0                               | 16 (0.7%)           |
| T1                               | 201 (8.4%)          |
| T2                               | 1369 (57.6%)        |
| T3                               | 579 (24.4%)         |
| T4                               | 212 (8.9%)          |
| <i>Clinical N stage</i>          |                     |
| N0                               | 890 (37.4%)         |
| N1                               | 1121 (47.2%)        |
| N2                               | 63 (2.7%)           |
| N3                               | 303 (12.7%)         |
| <i>Clinical Stage</i>            |                     |
| I                                | 52 (2.2%)           |
| IIA                              | 732 (30.8%)         |
| IIB                              | 784 (33.0%)         |
| IIIA                             | 349 (14.7%)         |
| IIIB                             | 157 (6.6%)          |
| IIIC                             | 303 (12.7%)         |
| <i>Pathologic tumor size, cm</i> |                     |
| Median                           | 1.6                 |
| Range                            | 0-25                |
| <i>Pathologic T stage</i>        |                     |
| T0/is                            | 685 (28.8%)         |
| T1                               | 692 (29.1%)         |
| T2                               | 646 (27.2%)         |
| T3                               | 312 (13.1%)         |
| T4                               | 41 (1.7%)           |
| Unknown                          | 1                   |
| <i>Pathologic Nodal Status</i>   |                     |
| Nx                               | 0                   |
| N0/N0 (i+)                       | 1317 (55.4%)        |
| N1                               | 602 (25.3%)         |
| N2                               | 295 (12.4%)         |
| N3                               | 163 (6.9%)          |
| <i>Pathologic Stage</i>          |                     |
| 0                                | 619 (26.0%)         |

|                                                                  |              |
|------------------------------------------------------------------|--------------|
| I                                                                | 436 (18.4%)  |
| IIA                                                              | 458 (19.3%)  |
| IIB                                                              | 302 (12.7%)  |
| IIIA                                                             | 372 (15.6%)  |
| IIIB                                                             | 27 (1.1%)    |
| IIIC                                                             | 163 (6.9%)   |
| <i>ER status</i>                                                 |              |
| <1%                                                              | 688 (28.9%)  |
| 1-9%                                                             | 196 (8.3%)   |
| ≥10%                                                             | 1493 (62.8%) |
| <i>HER2 status</i>                                               |              |
| Positive                                                         | 591 (24.9%)  |
| Negative                                                         | 1786 (75.1%) |
| <i>Nuclear Grade</i>                                             |              |
| 1                                                                | 110 (4.6%)   |
| 2                                                                | 842 (35.4%)  |
| 3                                                                | 1425 (60.0%) |
| <i>pCR</i>                                                       |              |
| Yes                                                              | 619 (26.0%)  |
| No                                                               | 1758 (74.0%) |
| <i>Neoadjuvant therapy</i>                                       |              |
| Anthracycline-based                                              | 51 (2.1%)    |
| Taxane-based                                                     | 158 (6.6%)   |
| Combination                                                      | 2168 (91.2%) |
| <i>Neoadjuvant trastuzumab therapy in HER2+ patients (n=591)</i> |              |
| Yes                                                              | 591 (100%)   |
| No                                                               | 0            |
| <i>Surgical therapy</i>                                          |              |
| Mastectomy                                                       | 1580 (66.5%) |
| Lumpectomy                                                       | 785 (33.0%)  |
| Nodal surgery only                                               | 12 (0.5%)    |
| <i>Adjuvant endocrine therapy</i>                                |              |
| Yes                                                              | 1473 (62.0%) |
| No                                                               | 877 (36.9%)  |
| Unknown                                                          | 27 (1.1%)    |
| <i>Adjuvant endocrine therapy in ER+ patients (n=1654)*</i>      |              |
| Yes                                                              | 1429 (86.4%) |
| No                                                               | 205 (12.4%)  |
| Unknown                                                          | 20 (1.2%)    |
| <i>PMRT in patients undergoing mastectomy</i>                    |              |
| Yes                                                              | 1190 (75.3%) |
| No                                                               | 377 (23.9%)  |

|         |           |
|---------|-----------|
| Unknown | 13 (0.8%) |
|---------|-----------|

\* To determine use of adjuvant hormonal therapy in ER+ patients, a cutoff of ER  $\geq 10\%$  was used for patients treated prior to 2010 to define ER+ tumors and  $\geq 1\%$  for patients treated from 2010-2012.

Abbreviations: ER, estrogen receptor; pCR, pathologic complete response; ER, estrogen receptor; PMRT, post-mastectomy radiation therapy.

eFigure 1

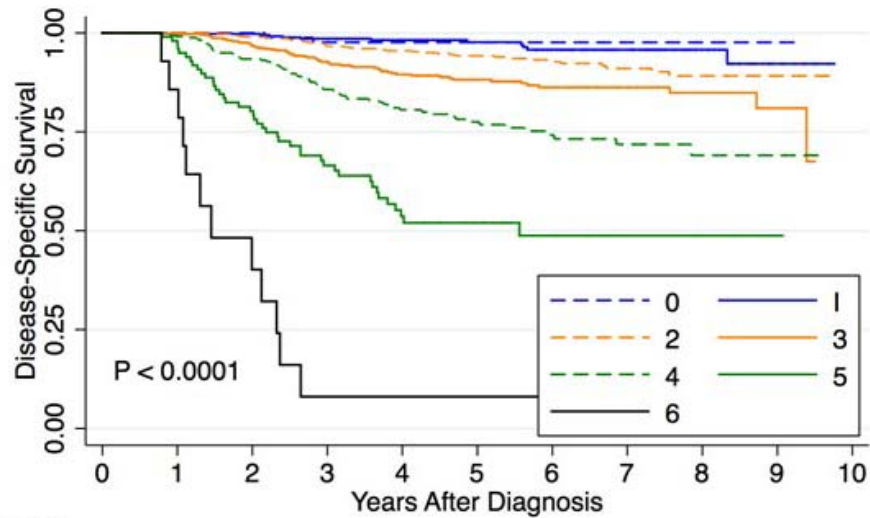

| Number at risk |     | 0   | 1   | 2   | 3   | 4   | 5   | 6   | 7  | 8  | 9 | 10 |
|----------------|-----|-----|-----|-----|-----|-----|-----|-----|----|----|---|----|
| Score = 0      | 95  | 94  | 88  | 76  | 67  | 52  | 40  | 31  | 14 | 2  | 0 | 0  |
| Score = 1      | 387 | 385 | 361 | 301 | 247 | 185 | 130 | 86  | 32 | 10 | 1 | 1  |
| Score = 2      | 809 | 796 | 718 | 587 | 452 | 316 | 213 | 126 | 65 | 14 | 3 | 3  |
| Score = 3      | 629 | 625 | 553 | 426 | 311 | 228 | 155 | 92  | 46 | 14 | 2 | 2  |
| Score = 4      | 344 | 339 | 293 | 226 | 160 | 111 | 74  | 44  | 23 | 9  | 1 | 1  |
| Score = 5      | 99  | 97  | 75  | 53  | 34  | 23  | 12  | 6   | 4  | 1  | 0 | 0  |
| Score = 6      | 14  | 12  | 5   | 1   | 1   | 1   | 1   | 0   | 0  | 0  | 0 | 0  |

Disease-specific survival in breast cancer patients receiving neoadjuvant chemotherapy determined based on the CPS+EG staging system using a 10% cutoff for ER-positivity.

eFigure 2

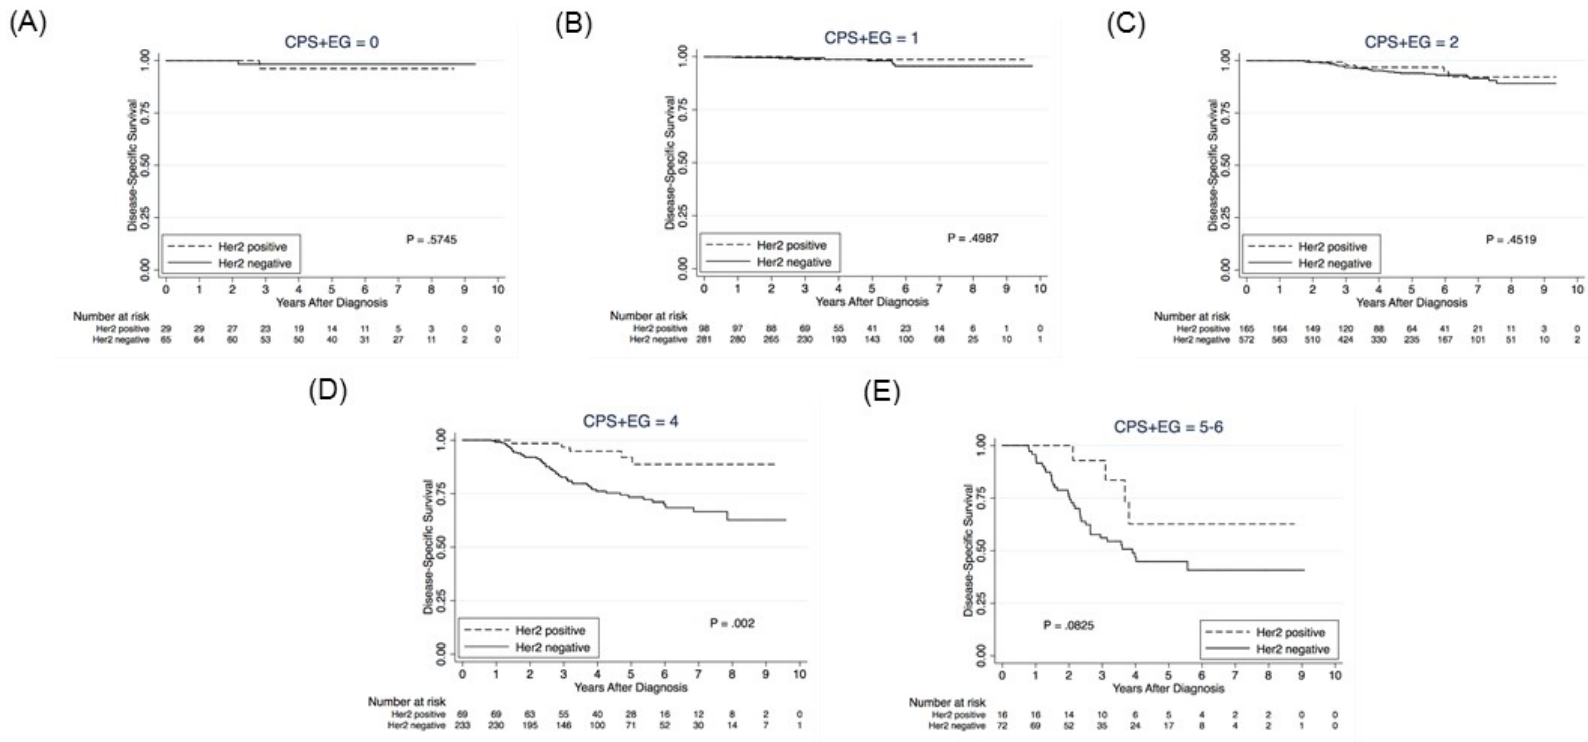

Disease-specific survival in breast cancer patients receiving neoadjuvant chemotherapy determined based on the CPS+EG staging system stratified by HER2 status within each score.
